# Supplementary material
Source: PubMed Central journal article supplement (PMC4023788)
Supplement: AAC.02114-13_zac004142718so1.pdf [file AAC.02114-13_zac004142718so1.pdf]

**SUPPLEMENTARY TABLE 1. Pre-steady-state kinetic constants for binding and incorporation of dCTP and 3TC-TP by WT and E138A HIV-1 RTs <sup>a</sup>**

| RT    | dCTP                            |            |                                                       | 3TC-TP                          |             |                                                       | Selectivity <sup>b</sup> | Fold-R <sup>c</sup> |
|-------|---------------------------------|------------|-------------------------------------------------------|---------------------------------|-------------|-------------------------------------------------------|--------------------------|---------------------|
|       | $k_{pol}$<br>(s <sup>-1</sup> ) | $K_d$ (μM) | $k_{pol}/K_d$<br>(μM <sup>-1</sup> .s <sup>-1</sup> ) | $k_{pol}$<br>(s <sup>-1</sup> ) | $K_d$ (μM)  | $k_{pol}/K_d$<br>(μM <sup>-1</sup> .s <sup>-1</sup> ) |                          |                     |
| WT    | 1.8±0.6                         | 1.3±0.1    | 1.38                                                  | 0.043±0.01                      | 0.090±0.014 | 0.48                                                  | 2.9                      | -                   |
| E138A | 1.9±0.2                         | 3.7±0.7    | 0.51                                                  | 0.032±0.02                      | 0.61±0.09   | 0.05                                                  | 10.2                     | 3.5                 |
| E138K | 1.9±0.4                         | 1.2±0.1    | 1.58                                                  | 0.037±0.02                      | 0.115±0.11  | 0.32                                                  | 4.9                      | 1.7                 |

<sup>a</sup> Data are the mean ± standard deviations of results from 3 independent experiments.

<sup>b</sup> Selectivity is defined as follows: ( $k_{pol}/K_d$  value for incorporation of dCTP)/( $k_{pol}/K_d$  value for incorporation of 3TC-TP).

<sup>c</sup> The change in resistance was calculated as follows: selectivity of the E138A mutant/selectivity of the WT.
